# Supplementary material for: Public health palliative care interventions that enable communities to support people who are dying and their carers: a scoping review of studies that assess person-centered outcomes
Source: PubMed Central journal article supplement (PMC10410270; doi:10.3389/fpubh.2023.1180571), 2023-07-26
Supplement: Table_1.pdf [file Table_1.pdf]

## Appendix 1.

### Search Strategy Medline search terms:

1. exp terminal care/
2. exp terminally ill/ 3. (terminal\* adj
- 3 (care or caring)).mp.
4. last year of life.mp.
5. LYOL.mp.
6. (end of life or end-of-life).mp.
7. (hospice or hospice care).mp.
8. Palliat\*
9. Dying
10. 1 or 2 or 3 or 4 or 5 or 6 or 7 or 8 or 9
11. Public health
12. Mobilise
13. Community resource
14. Community network
15. Social network
16. Health promotion
17. Social change
18. Social support
19. Community development
20. Community participation
21. Community engagement
22. Compassionate community
23. 11 or 12 or 13 or 14 or 15 or 16 or 17 or 18 or 19 or 20 or 21 or 22
24. 10 AND 23
